# Supplementary material for: Design of the NnH3n+1+series of “non-metallic” superalkali cations
Source: Royal Society of Chemistry journal article supplement (doi:10.1039/c8nj06126b), 2019-01-01
Supplement: c8nj06126b1.pdf [file c8nj06126b1.pdf]

Supplementary Information for Review Only

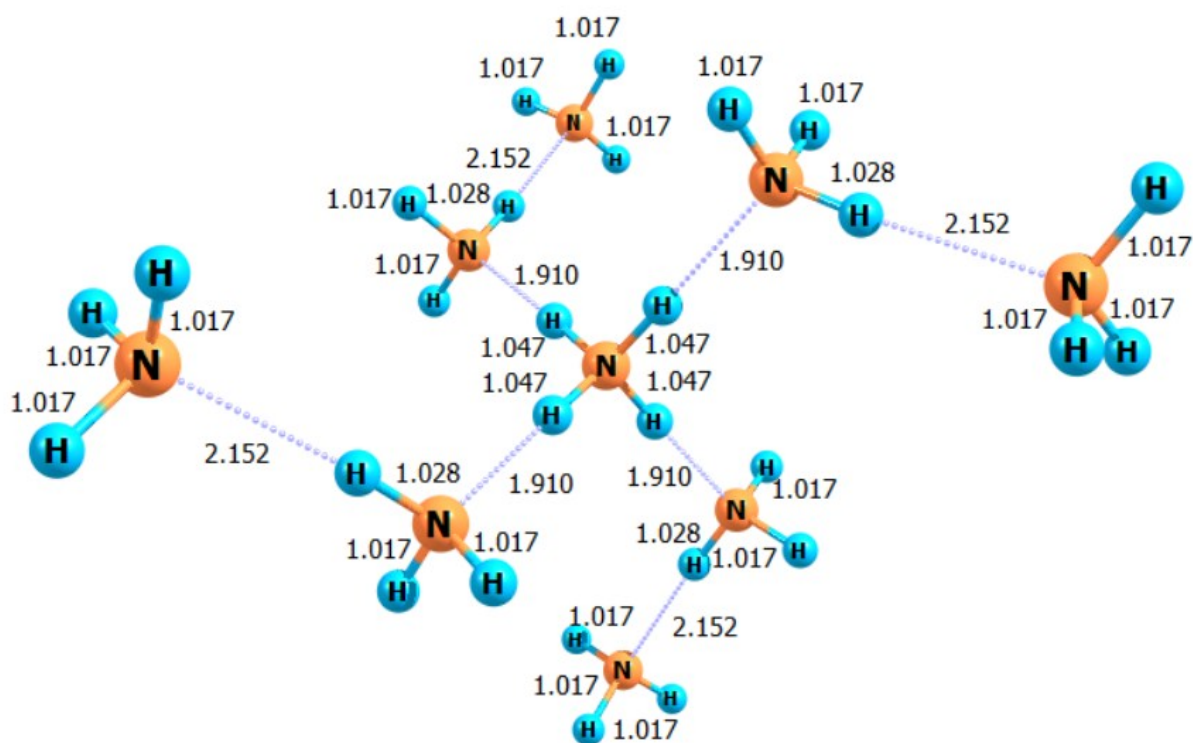

Optimized structure of  $\text{N}_9\text{H}_{28}^+$  cluster at B3LYP/6-311++G(d,p) level.
